# Supplementary material for: Efficacy of electrical pudendal nerve stimulation versus pelvic floor muscle training in treating postradical prostatectomy urinary incontinence: study protocol for a randomised controlled trial
Source: HighWire-hosted journal article supplement (doi:10.1136/bmjopen-2022-062323), 2023-01-01
Supplement: bmjopen-2022-062323supp001_data_supplement.pdf [file bmjopen-2022-062323supp001_data_supplement.pdf]

Supplementary Table 1. Urinary incontinence score questionnaire

|    |                                                                      | Stress-score | Urge-score |
|----|----------------------------------------------------------------------|--------------|------------|
| 1. | How often do you experience urine leakage?                           |              |            |
|    | Rarely                                                               | 1            |            |
|    | Sometimes                                                            | 1            |            |
|    | Every day, many times a day                                          |              | 1          |
|    | Constantly                                                           |              | 1          |
| 2. | On what occasions have you experienced leakage?                      |              |            |
|    | When coughing or sneezing                                            | 1            |            |
|    | When sitting or lying down                                           |              | 1          |
| 3  | How much urine leaked                                                |              |            |
|    | Only a few drops to a small amount                                   | 1            |            |
|    | A considerable amount                                                |              | 1          |
| 4  | At what intervals do you go to the toilet to pass urine every day?   |              |            |
|    | At 3-6-h intervals                                                   | 3            |            |
|    | At 1-2-h intervals                                                   |              | 2          |
| 5  | Do you go to the toilet to pass urine after falling asleep at night? |              |            |
|    | Never, or once a night                                               | 3            |            |

|    |                                                                                                  |   |   |
|----|--------------------------------------------------------------------------------------------------|---|---|
|    | More than once a night or many times a night                                                     |   | 3 |
| 6  | Do you ever experience urine leakage when sleeping at night?                                     |   |   |
|    | Never                                                                                            | 1 |   |
|    | Often                                                                                            |   | 1 |
| 7  | When you feel urinary urgency, can you control it?                                               |   |   |
|    | Yes, I can                                                                                       | 3 |   |
|    | Unless I go to the toilet soon (in 10-20 min), I leak urine                                      | 2 |   |
|    | I cannot control it, and I leak urine.                                                           |   | 3 |
| 8  | Do you ever leak urine on the way to the toilet?                                                 |   |   |
|    | Never, or rarely                                                                                 | 3 |   |
|    | Almost always                                                                                    |   | 3 |
| 9  | Do you ever leak urine because you feel sudden and strong urinary urgency and cannot control it? |   |   |
|    | Never                                                                                            | 3 |   |
|    | Sometimes, or often                                                                              |   | 3 |
| 10 | Can you stop and start voiding in the middle of the urination?                                   |   |   |
|    | Yes, I can                                                                                       | 1 |   |
|    | No, I cannot                                                                                     |   | 2 |

|    |                                                                                                              |   |   |
|----|--------------------------------------------------------------------------------------------------------------|---|---|
| 11 | After urination, do you have a feeling of residual urine (a feeling that there is urine left in the bladder) |   |   |
|    | No, I do not                                                                                                 | 1 |   |
|    | Yes, I do                                                                                                    |   | 1 |
| 12 | Do you often feel such urinary urgency that you want to go to the toilet immediately?                        |   |   |
|    | No, never                                                                                                    | 3 |   |
|    | Yes, I do                                                                                                    |   | 3 |
|    | Yes, very often                                                                                              |   | 2 |
| 13 | Have you ever experienced childbirth?                                                                        |   |   |
|    | Yes, I have                                                                                                  |   |   |
|    | No, I have not                                                                                               |   | 1 |
| 14 | How do you feel about your urine leakage?                                                                    |   |   |
|    | It sometimes troubles me or it does not bother me very much                                                  | 1 |   |
|    | It troubles me very much                                                                                     |   | 1 |
| 15 | How much do you weigh?                                                                                       |   |   |
|    | I weigh less than 65 kg                                                                                      |   |   |
|    | I weigh 65kg or more                                                                                         | 1 |   |
