# Supplementary material for: Efficacy of electrical pudendal nerve stimulation versus pelvic floor muscle training in treating postradical prostatectomy urinary incontinence: study protocol for a randomised controlled trial
Source: HighWire-hosted journal article supplement (doi:10.1136/bmjopen-2022-062323), 2023-01-01
Supplement: bmjopen-2022-062323supp004_data_supplement.pdf [file bmjopen-2022-062323supp004_data_supplement.pdf]

Supplemental Table 4 The 24-hour pad test procedure

|                                                                                                                                                                                                                                                                                                                                                                     |
|---------------------------------------------------------------------------------------------------------------------------------------------------------------------------------------------------------------------------------------------------------------------------------------------------------------------------------------------------------------------|
| <p>A pad test will be carried out one time for each of you at baseline before your next follow-up visit.</p> <p>Same type of diapers will be provided free of charge to you at baseline and end-point assessments.</p> <p>Here are steps:</p>                                                                                                                       |
| <ol style="list-style-type: none"><li>1. Change the diaper every 4–6 h during the daytime</li><li>2. Collect all diapers through the daytime and nighttime (A night pad is not required if you does not leak when you are having a sleep) and store them in an airtight bag.</li><li>3. Bring the bag to the clinic where the weighing will be performed.</li></ol> |
| <p>Thank you for your help.</p>                                                                                                                                                                                                                                                                                                                                     |
